# Supplementary material for: Redox-Switchable Single-Atom Iron Dimer Catalysts for Controlled Oxidation of Biomass-Derived Hydroxymethylfurfural in Water
Source: Research Square preprint supplement (doi:10.21203/rs.3.rs-6623196/v1), 2025-06-03
Supplement: Supplementary file 1 [file bd2ff4ac04f902d68f5a1238.docx]

**Supporting Information**

**Redox-Switchable Single-Atom Iron Dimer Catalysts for Controlled Oxidation of Biomass-Derived Hydroxymethylfurfural in Water.**

Jacky H. Advani,a David Panáček,a,b Petr Langer,a Daniela Plachá,a En Zhao,c Shibo Xi,d Zupeng Chen,c Rajenahally V. Jagadeesh,a,e Giorgio Zoppellaro,a,b* Aristides Bakandritsos,a,b* Radek Zbořila,b*

aNanotechnology Centre, Centre for Energy and Environmental Technologies, VSB–Technical University of Ostrava, 17. listopadu 2172/15, Poruba, Ostrava 708 00, Czech Republic

bRegional Centre of Advanced Technologies and Materials, Czech Advanced Technology and Research Institute (CATRIN), Palacký University Olomouc, Šlechtitelů 241/27, Olomouc 783 71, Czech Republic

cCollege of Chemical Engineering, Nanjing Forestry University, Longpan Road 159, Nanjing 210037, China

dInstitute of Sustainability for Chemicals. Energy and Environment (ISCE, Agency for Science, Technology and Research (A*STAR); 1 Pesek Road Jurong Island, Singapore, 627833, Republic of Singapore

eLeibniz-Institut für Katalyse e.V., Albert-Einstein-Str. 29a, D-18059 Rostock, Germany.

1. **Materials and methods**
   1. **Chemicals**

All chemicals were of analytical grade and used as received. 5-Hydroxymethylfurfural (HMF, 99%, Sigma-Aldrich), 5-hydroxymethyl-2-furancarboxylic acid (HMFCA, >99%, Sigma-Aldrich), 2,5-diformylfuran (DFF, >99%, Sigma-Aldrich), 5-formyl-2-furoic acid (FFCA, >99%, Sigma-Aldrich), 2,5-furandicarboxylic acid (FDCA, 99%, Sigma-Aldrich), graphite fluorinated polymer (>61 wt.% F-GF, Sigma-Aldrich), sodium azide (NaN3, 99%, Millipore Sigma), dimethylformamide pure (DMF, Lachner), absolute ethanol (Penta), nitric acid (HNO3, 65%, Lachner), acetone (99%, Millipore Sigma), Fe(NO3)3·9H2O (p.a., Merck), Acetonitrile (CHROMASOLV® gradient grade, for HPLC, ≥99.9%, Sigma-Aldrich) and Ammonium formate (99%, Penta) were purchased from different companies. Ultrapure water (18.2 MΩ) was used for the preparation of all the needed solutions and for the EPR measurements.

- 1. **Characterization**

The fine morphological characteristics of the catalyst were determined with high-resolution transmission electron microscopy (TEM) at 80 kV accelerating voltage on FEI Titan G2 60-300 transmission electron microscope equipped with an X-FEG electron gun, objective-lens image spherical aberration corrector, and a ChemiSTEM EDS detector. The structure of the catalyst was also analyzed with a TEM JEOL 2010 with LaB6 type emission gun, operating at 160 kV with a resolution of 0.19 nm. For the sample preparation, a very dilute dispersion of catalyst (~0.1 mg mL–1) was prepared by sonication and deposited on a carbon-coated copper grid and analyzed after drying for 24 h at room temperature. STEM-elemental mapping, used to determine the EDS pattern and the distribution of elements, was performed using HAADF-STEM (high-angle annular dark-field scanning transmission electron microscopy) on a FEI Titan HRTEM microscope operating at 80 kV.

Continuous wave electron paramagnetic resonance (EPR) spectra were recorded on a JEOL JES-X-320 spectrometer (JEOL, Tokyo, Japan) operating at X-band frequency (~9.08 GHz) and equipped with a variable-temperature controller (He, N2) ES-CT470 apparatus. Highly pure quartz tubes (Suprasil, Wilmad, ≤0.5 OD) were used as sample holders, and accuracy in the experimentally determined g-values was obtained by using a Mn(II)/MgO standard (JEOL standard, g = 2.00105). The cavity quality factor (Q) was kept above 6000 in all measurements. The filling factors were kept constant at 150 µL. Experimental temperature was set to T = 100 K in all measurements, with a modulation frequency of 100 kHz, a time constant of 30 ms, and an acquisition time of 8 minutes. The Fe-NGA concentration during measurements was kept in the range of 5.3-5.8 mg/mL in H2O. To probe the interaction between the Fe-NGA catalyst and K2CO3 base (K2CO3, 0.1 M in water), hydrogen peroxide (30% w/w), and the substrate (HMF), different solutions were prepared. To 200 µL of the Fe-NGA catalyst dispersed in ultrapure water, either (a) 10 µL of hydrogen peroxide (30%) stock solution, or (b) 10 µL of K2CO3 stock solution together with 10 µL of HMF in water (50 mM) was added. The mixtures were sonicated in a pre-heated ultrasound water bath for at least 5 min. Afterwards, 150 µL of the mixture was quickly transferred to quartz EPR tubes, freeze-quenched in a dry-ice acetone bath, and the EPR spectra were recorded at 100 K.

The metal content of fresh and reused catalyst was determined with ICP-MS (Agilent 7700x, Agilent, Japan). A weighted amount of sample from the catalyst (on a 0.01 mg read-out balance, Kern ABT 220-5DNM) was digested with nitric acid in a microwave digester followed by dilution with water. The mixture was centrifuged to precipitate solid residues, and the upper half of the supernatant was used for Fe determination.

X-ray photoelectron spectroscopy (XPS) analyses were performed using a Thermo Scientific K-Alpha instrument equipped with an Al Kα source (10 mA, 14 kV) and operating at 1486.8 eV during the measurement. The pass energy was set to 30 eV for high-resolution analysis. Charge shift was corrected by adjusting the binding energy C 1s to 284.7 eV. The data processing was performed using the commercial Avantage software (Thermo Fisher Scientific Inc.). For the fitting procedure, a Shirley background has been used, and Lorentzian–Gaussian ratio was fixed at 30%.

Theoretical calculations of the geometry‑optimized NGA and Fe-NGA models were performed by semiempirical (RHF/PM3 and UHF/PM3tm) methods. The computational software Spartan 10 (v. 1.1.0), Wavefunction Inc., Irvine Ca. 92612, USA, was used for the theoretical treatments.

- 1. **Product analysis from the catalytic reaction**

The sample after the catalytic reaction was diluted with ultrapure water and filtered through a PTFE filter (0.22 µm). The reaction products were analyzed by HPLC (Waters Alliance, separation module e2695) equipped with a photodiode array detector (Waters PDA detector 2998) using an XBridge C18 column (3.5 µm 4.6 mm×100 mm). The mobile phases were acetonitrile (eluent A) and 0.5 mM ammonium formate in ultrapure water (eluent B) with a flow rate of 0.8 mL min−1. The following gradient elution was used: 0-0.2 min 90% B, 0.5 – 4.0 min 40 % B and 4.5 – 13.0 90% B. The injection volume was 5 µL. The column temperature was set at 40 °C. The maximum absorption was found for HMF (λ=284 nm), FDCA (λ=263 nm), FFCA (λ=286 nm), HFCA (λ=250 nm) and DFF (λ=289 nm). HMF conversion, DFF selectivity, TOF and specific productivity are defined as follows:

(1)

(2)

(3)

(4),

where *n* represents the mmoles of the HMF, the DFF or the mmoles of Fe in the Fe-NGA catalyst and *g*catalyst represents the mass of the whole catalyst added in the reaction.

**Supplementary results**

1. **Catalyst characterization**
   1. **XPS analysis**

**Figure S1.** XPS survey spectra of (a) the NGA support and (b) the Fe-NGA catalyst, along with the atomic contents.

**Figure S2.** HR-XPS of the NGA support and Fe-NGA catalyst for the spectral regions of: (a) C 1s, (b) N 1s, and (c) Fe 2p. For the C1s region, the protonated and deprotonated carboxylic groups are separated with about 1 eV, as previously known from relevant studies (<https://pubs.acs.org/doi/10.1021/ac5020386>). For the nitrogen analysis, the −N= (sp2), and −NH− (sp3) components represent pyridinic (1 part according to the area), piperidinic-like (or pyrrolic; 3 parts), the nitrogen with the three bonds represents graphitic (very low content ~0.3 parts), and N−O is nitro− groups, generated upon HNO3 treatment of the NG and oxidation of some nitrogen groups.

- 1. **FTIR analysis**

**Figure S3.** FT-IR spectra of NGA and Fe-NGA. (a) Full-range spectra and (b) enlarged view of the 900–1800 cm−1 region.

- 1. **XAS analysis**

**Figure S4.** (a) k-space FT-EXAFS spectra of Fe-NGA and Fe foil, (b) R-space fitting for Fe-NGA, and (c) k-space fitting for Fe-NGA.

| **Table S1.** Structural parameters for Fe-NGA catalyst | | | | | | |
| --- | --- | --- | --- | --- | --- | --- |
| **Catalyst** | **Shell** | **Na** | **Rb (Å)** | **σ2c×103 (Å2)** | **ΔE0d (eV)** | **R factore** |
| Fe-NGA | Fe-N/O | 6.05 ± 0.3 | 2.02 | 3.8 | -1.00 ± 0.86 | 0.018 |
| Fe-Fe | 1.24 ± 0.3 | 2.86 | 4.5 |
| aCoordination numbers, bBond distance, cDebye-Waller factors, dInner potential correction, eGoodness of fit. Ѕ02 was set to 0.93.  The data range used for data fitting in k-space (∆k) and R-space (∆R) are 3.0-11.3 Å-1 and 1.0-2.2 Å, respectively. | | | | | | |

- 1. **Modelling and catalyst structure**

**Figure S5.** The geometry optimized structures of (**a**)theNGA support (RHF/PM3) and (**b**) the Fe-NGA catalysts (UHF/PM3tm)1,2. NGA support: charge = 0, multiplicity = 1, Heat of formation = -2349.23 kJ/mol, EHOMO = -8.72 eV, ELUMO = -2.09 eV, dipole moment = 8.13 debye. Fe-NGA: charge = +2, multiplicity = 6, Heat of formation = -4115.21 kJ mol−1, EHOMO = -13.30 eV, ELUMO = -7.23 eV, dipole moment = 15.42 debye. Cartesian coordinates (.xyz) for NGA are given in Table S4 and for Fe-NGA in Table S5. The theoretical calculations were carried out by the computational software Spartan 10 (v. 1.1.0), Wavefunction Inc., Irvine Ca. 92612, USA.

1. **Reaction optimization**

| **Table S2.** Reaction optimization studies. | | | |
| --- | --- | --- | --- |
| **No.** | **Catalyst** | **HMF Conv. (%)** | **DFF Sel. (%)** |
| 1 | Fe(NO3)3 | 23 | 20 |
| 2 | FeCl2 | 87 | 19 |
| 3 | Fe(NO3)3 +FeCl2b | 30 | 62 |
| 4 | Fe-NGAa | 100 | 93 |
| 5 | Fe-NGAc | 97 | 95 |
| 6 | Fe-NGAd | 10 | 6 |
| 7 | Fe-NGAe | 89 | 95 |
| 8 | Fe-NGAf | 80 | 91 |
| Reaction Conditions: a 0.125 mmol HMF, 0.25 mmol K2CO3, HMF/metal molar ratio in the catalyst was 56:1, 1 MPa O2, 100 °C, b Fe2+:Fe3+ = 1, c 0.5 MPa O2 , d 1 MPa N2, e 0.125 mmol K2CO3, f 80 °C. | | | |

The base was crucial for maximizing the catalytic activity (Table S2, entries 3 and 7). Without the addition of base, negligible HMF conversion was observed. Under nitrogen atmosphere negligible activity was recorded.

1. **Calibration curves and chromatogram for HMF oxidation to DFF**


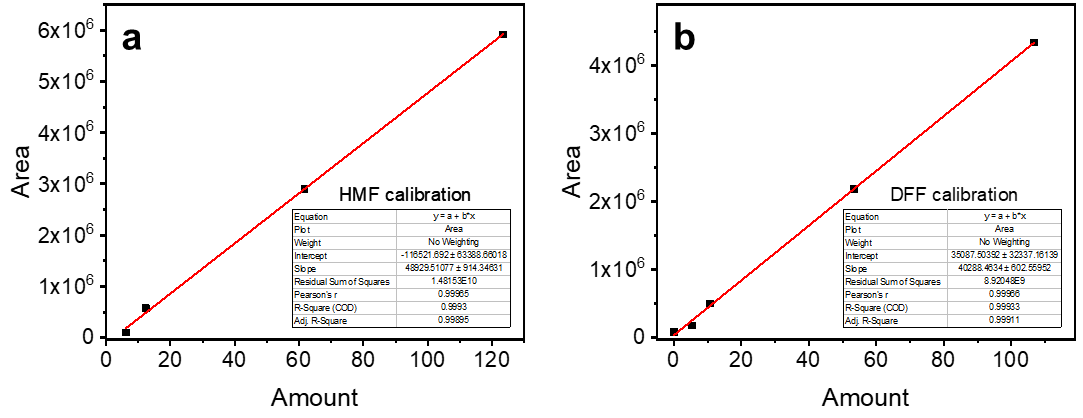


**Figure S6.** (a) Calibration curve for HMF and (b) for DFF.

**Figure S7.** Representative chromatograph of product analysis for the HMF oxidation to DFF.

1. **Characterization of the reused catalyst**

**Figure S8.** XPS analysis of the reused Fe-NGA catalyst: (a) Survey spectra and (b) HR-XPS of the Fe 2p region.

1. **Comparison of performance of Fe-NGA with reported catalysts for HMF to DFF transformation**

**Table S3.** Comparative overview of the Fe-NGA with previously reported catalysts for HMF oxidation.

| **No.** | **Catalyst** | **Reaction conditions** | **Solvent** | **HMF**  **Conv. (%)** | **DFF**  **Sel. (%)** | **TOF (h-1)** | **Sp. Productivity**  **(mmolDFF gcat-1 h-1)** | **Ref.** |
| --- | --- | --- | --- | --- | --- | --- | --- | --- |
| 1 | Cu SAs/p-CNS | 0.05 mmol HMF, 0.1 MPa O2, 24 h, RT, 20W Blue LED | DMF | 77.1 | 85.6 | 1.2 | 0.3 | 3 |
| 2 | Ru complex@CdS | 0.01 mmol HMF, Ar, 16 h, RT, 300 W Xe Lamp | ACN | 81 | 91.8 | 0.03 | 0.05 | 4 |
| 3 | Oxovanadium complex | 2 mmol HMF, 0.4 MPa O2, 80 °C, 2 h | ACN | 99 | 97.1 | 9.6 | – | 5 |
| 4 | HCP-OH-C-VC | 1 mmol HMF, 0.5 MPa O2, 100 °C, 4 h | ACN | 99 | 99 | 5.7 | 6.1 | 6 |
| 5 | ZnIn2S4 | 10 mmol HMF, AM 1.5G, 2.5 h, RT, light | 1M KOH/DMF | ~40 | >97 | - | 1.6 | 7 |
| 6 | ZnIn2S4/CeO2 | 8 mmol HMF, Air, 1.3 h, RT, Light | ACN | 100 | 96.1 | 2.9 | 0.95 | 8 |
| 7 | Mn5O8 | 0.5 mmol HMF, 0.5 MPa O2, 140 °C, 2 h | EtOH | 51 | 94 | 0.9 | 2.4 | 9 |
| 8 | PdNi@MnO2 | 0.32 mmol HMF, 1.5 MPa O2, 120 °C,1 h | Dioxane | 100 | 99 | 0.8 | 6.3 | 10 |
| 9 | FeCo/C | 1 mmol HMF, 1 MPa O2, 100 °C, 6 h | Toluene | 100 | 99 | 0.8 | 0.4 | 11 |
| 10 | Ru/γ-Al2O3 | 3.96 mmol HMF, 0.5 MPa O2, 110 °C, 5 h | DMF | 91.2 | 21.2 | 0.01 | 0.3 | 12 |
| 11 | Au NPs@sPSB | 0.13 mmol HMF, 1.5 MPa O2, 80 °C, 16 h | DMF/DMA | 78 | 80 | 0.98 | 0.1 | 13 |
| 12 | Ru@CTF | 1 mmol HMF, 2 MPa air, 80 °C, 3 h | MTBEa | 97.3 | 72.7 | 9.4 | 3.5 | 14 |
| 13 | Fe2O3@HAP-Ru | 0.79 mmol HMF, 20 mL min-1 O2, 80 °C, 4 h | Toluene | 100 | 89.1 | 5.9 | 1.2 | 15 |
| 14 | Cu(NO3)2 + VOSO4 | 10 mmol HMF, 0.1 MPa O2, 80 °C, 5 h | ACN | 99 | 99 | 4.9 | – | 16 |
| 15 | Mn6Fe1Ox | 1 mmol HMF, 1.5 MPa O2, 110 °C, 5 h | DMF/H2O | 97 | 98 | 0.2 | 2.4 | 17 |
| 16 | Ru/MnCo2O4 | 2 mmol HMF, 1 MPa O2, 130 °C, 3 h | Toluene | 98.3 | 100 | 0.5 | 3.3 | 18 |
| **17** | **Fe-NGA** | **0.1 mmol HMF, 1 MPa O2, 100 °C, 3 h** | **H2O** | **100** | **93** | **17.4** | **12.5** | **This**  **Work** |
| **18** | **Fe-NGA** | **0.1 mmol HMF, 0.5 MPa O2, 100 °C, 3 h** | **H2O** | **97** | **95** | **~17.3** |

aMTBE = methyl t-butyl ether

1. **Reaction mechanism and computational models**

**Figure S9.** The key spin active species observed by EPR during catalysis of HMF by Fe-NGA. The computational models employed here use a smaller size of the NGA support but retain the complete binding region for the two Fe cations shown in the larger model (see Figure S5b). The structures were computed at first by screening the conformational space using combination of MMFF94/MC in an energy window of 40 kJ mol−1, and then the best scored structures were refined by UHF/PM3tm.

**Figure S10.** Other possible reaction mechanism for HMF oxidation by the Fe-NGA catalyst involving Fe(III)-Fe(III) and Fe(II)-Fe(II) pairs.

**Comments**: The other possible pathway available in Fe-NGA, as shown in Figure 4 of the main manuscript, can also contribute to catalysis, and employ a combination of redox-active Fe3+–Fe3+ and/or Fe2+–Fe2+ dimers. However, during catalytic oxidation of HMF, none of the intermediates shown above provide access to the mixed valent states (Fe3+–Fe2+; Fe3+–Fe4+), thus no catalytic intermediates reported in the reaction scheme above can give rise to the experimentally observed EPR signal shown in Figure 2d,k,g,n.

~~
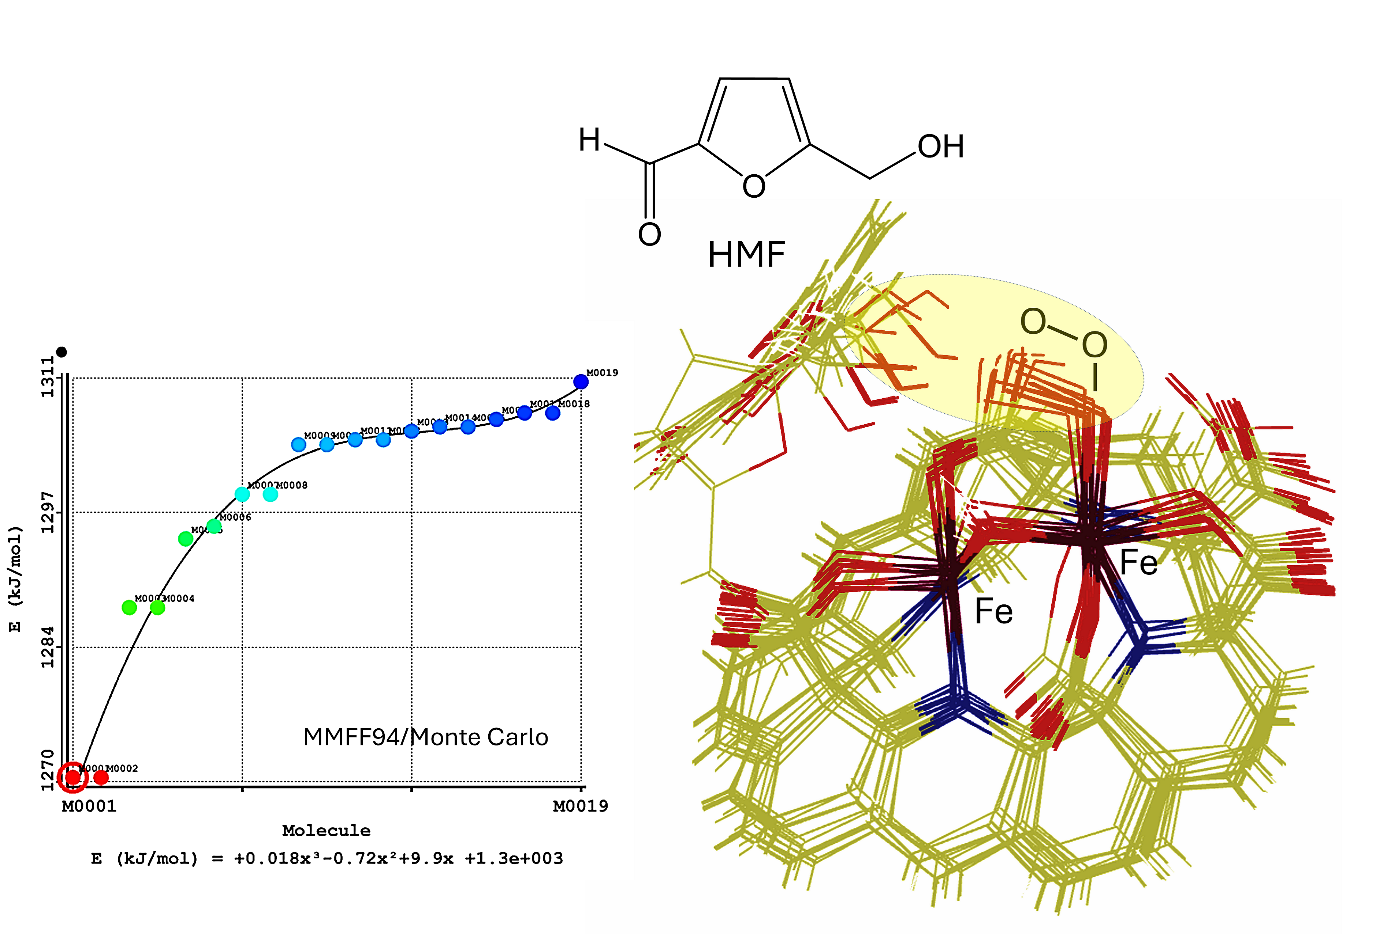
~~

**Figure S11**. The interaction of HMF with Fe-NGA when intermediate [II] is present in the reaction environment, Fe(III)-μ-OH-(O2)-Fe(IV). The alcohol chain (–CH2–OH) closely interacts with the Fe(IV)-O2- centre (highlighted by a yellow oval), while the formyl part of HMF consistently positioned itself over the Fe(III) centre. Calculation of the conformer’s distribution shown in the figure employed combination of MMFF9419 and Monte Carlo algorithm, which uses a simulated annealing to generate a set of possible conformations of the two molecules, HMF and Fe-NGA. The initial temperature for the Monte Carlo (MC)/Simulated-Annealing algorithm was set to *T* = 5000 K. Restricted searches were applied, using an energy window of *E*max = 40 kJ mol-1 from a pool of 1000 conformers. The best scored conformers (19) are shown as overlayed structures on the right and their energy difference on the left-plot.

1. **Cartesian coordinates of computational models**

**Table S4.** Cartesian coordinates for the NGA system obtained from geometry optimization shown in Figure S5a.

Run type: Geometry optimization

(Analytical Gradient)

(MM/Amide correction used)

Model: RHF/PM3

Number of shells: 217

125 S shells

92 P shells

Number of basis functions: 401

Number of electrons: 454

Use of molecular symmetry disabled

Molecular charge: 0

Spin multiplicity: 1

125

M0001

C 6.229008 0.082303 -3.528431

C 5.621701 2.231156 -2.541266

C 4.347896 0.171343 -1.877699

C 4.469273 1.661709 -1.978215

C 5.022721 -0.543898 -3.000827

C 6.527694 1.371268 -3.286823

H 4.920165 -0.110858 -0.945502

H 6.887261 -0.542273 -4.144125

H 7.445905 1.824301 -3.678485

C 4.574517 -1.728856 -3.458882

H 5.123798 -2.253429 -4.252562

C 3.352733 -2.361320 -2.989242

C 2.601883 -1.771124 -1.812573

C 2.936699 -0.283838 -1.635460

C 2.879993 -3.464681 -3.609465

H 3.437152 -3.924848 -4.436333

C 1.618044 -4.088601 -3.239159

C 0.727984 -3.429329 -2.377803

C 1.048031 -1.992572 -2.041319

C 1.263586 -5.328420 -3.775725

H 1.972612 -5.884664 -4.400117

C -0.016299 -5.812575 -3.565893

H -0.324116 -6.735576 -4.078698

C -0.913341 -5.138905 -2.725341

C -0.483402 -4.024333 -1.972673

N 0.360993 -1.546337 -0.810418

C -1.227312 -3.454234 -0.836116

C -1.029143 -1.967744 -0.518607

H 0.523088 -0.546521 -0.699086

C -2.046154 -4.140845 0.007329

C -3.003645 -3.403654 0.839192

H -3.953594 -3.919086 1.039181

C -2.715827 -2.155435 1.272766

C -1.275383 -1.755603 1.064169

N -0.983192 -0.352163 1.430190

C -1.645422 0.354213 2.566830

C -3.081949 -0.207909 2.864192

H -3.019495 -0.797758 3.824780

C -3.653074 -1.246904 1.924166

N 1.998819 0.501859 -1.214287

C 2.140916 1.959652 -1.059870

C 3.499292 2.493243 -1.427135

C 3.754438 3.857947 -1.218482

C 4.934700 4.406400 -1.722864

H 5.118999 5.481314 -1.581617

C 5.839909 3.606671 -2.413464

H 6.739292 4.054778 -2.851521

C 1.852608 2.463333 0.408536

C 1.814164 3.975434 0.309214

C 2.763566 4.634009 -0.459278

H 0.011897 -0.229396 1.504480

N 0.576325 1.870511 0.903539

C -0.158985 2.562804 2.011020

C -0.264437 4.045363 1.694620

C 0.770709 4.696070 0.953335

H -0.054392 1.798026 0.112223

C 0.731954 6.099891 0.807692

C 1.758939 6.762304 0.084110

H 1.738194 7.856509 0.018810

C 2.749824 6.048202 -0.532800

H 3.552526 6.542224 -1.100145

C -0.344698 6.835942 1.375944

H -0.353873 7.926864 1.266978

C -1.353383 6.192257 2.033702

H -2.194525 6.753616 2.456811

C -1.320459 4.780050 2.191614

C -1.586679 1.876582 2.109512

H -1.995059 1.870940 1.057201

C -2.550266 2.763190 2.831055

C -2.413021 4.106708 2.866531

H -3.159095 4.737110 3.368250

C -3.787800 2.177075 3.297868

H -4.552109 2.868749 3.680770

C -4.067351 0.867341 3.189926

C -5.006860 -1.377125 1.824429

C -5.894796 -0.634648 2.713910

C -5.434599 0.423104 3.408936

H -6.069030 0.996175 4.096462

C 3.123148 -2.502046 -0.551482

O 3.953572 -2.099304 0.242401

O 2.679839 -3.759372 -0.347735

H 2.924319 -4.045954 0.527511

C 0.606982 -1.195709 -3.316485

O 1.238642 -0.426671 -4.014002

O -0.657133 -1.416058 -3.743866

H -0.831705 -0.879960 -4.512336

C -2.057653 -1.095966 -1.281746

O -2.037424 0.109898 -1.454957

O -3.091937 -1.751222 -1.840180

H -3.692003 -1.137938 -2.253078

C -0.345483 -2.681493 1.903660

O 0.847169 -2.879662 1.792863

O -0.941099 -3.324497 2.936356

H -0.277802 -3.751642 3.470180

C -0.913870 0.088117 3.908206

O -0.144260 -0.816280 4.174206

O -1.233796 0.885377 4.954576

H -0.731115 0.614945 5.718116

C 0.631206 2.465177 3.333483

O 1.433578 1.625610 3.700133

O 0.430557 3.453055 4.234554

H 0.988328 3.297861 4.991476

C 2.999707 2.036444 1.357905

O 3.722828 2.756512 2.022325

O 3.229024 0.712176 1.437011

H 3.855862 0.521900 2.128114

C 1.089835 2.517912 -2.064140

O 1.262257 2.985572 -3.169815

O -0.193762 2.438403 -1.639909

H -0.799974 2.681758 -2.332114

C -5.706188 -2.261493 0.846423

O -6.334276 -3.284375 1.052829

O -5.686026 -1.812095 -0.429186

H -6.148922 -2.423761 -0.994684

C -7.310254 -1.054656 2.919613

O -7.809784 -1.527719 3.922214

O -8.140824 -0.820455 1.876194

H -9.011788 -1.150691 2.074545

C -2.101282 -5.613227 0.217812

O -3.076147 -6.315922 0.405227

O -0.895697 -6.227202 0.295495

H -1.019672 -7.155938 0.467887

N -2.342495 -5.610908 -2.812555

O -2.567729 -6.803864 -2.776211

O -3.223802 -4.797717 -2.988800

**Table S5.** Cartesian coordinates for the Fe-NGA system obtained from geometry optimization shown in Figure 5b.

M0001

Run type: Geometry optimization

(Analytical Gradient)

(MM/Amide correction used)

Model: UHF/PM3D

(PM3 H...H correction used)

Number of shells: 224

127 S shells

95 P shells

2 5D shells

Number of basis functions: 422

Number of electrons: 473

Use of molecular symmetry disabled

Molecular charge: 2

Spin multiplicity: 6

127

M0001

C 5.861635 0.236228 -3.828434

C 5.397217 2.261582 -2.532089

C 4.355472 0.138769 -1.846713

C 4.341789 1.632178 -1.822942

C 4.870599 -0.479625 -3.100816

C 6.156355 1.545922 -3.512922

H 5.136951 -0.164130 -1.082297

H 6.383566 -0.265225 -4.654004

H 6.954859 2.077315 -4.047608

C 4.462189 -1.740895 -3.500354

H 4.967838 -2.216873 -4.354052

C 3.348500 -2.421170 -2.927276

C 2.627557 -1.863553 -1.726437

C 3.104876 -0.438085 -1.302239

C 2.838203 -3.530695 -3.558725

H 3.372408 -3.990740 -4.402455

C 1.537028 -4.092509 -3.202174

C 0.666373 -3.353892 -2.387469

C 1.053703 -1.924018 -2.094716

C 1.130410 -5.320472 -3.721295

H 1.818458 -5.926455 -4.326257

C -0.188066 -5.735832 -3.531893

H -0.533250 -6.641516 -4.059314

C -1.060197 -5.016776 -2.708452

C -0.581265 -3.894418 -1.982396

N 0.248952 -1.301427 -1.014699

C -1.236677 -3.305004 -0.827844

C -1.096365 -1.812799 -0.621008

C -1.955586 -4.045770 0.161076

C -2.717263 -3.434014 1.130980

H -3.288114 -4.026715 1.863079

C -2.678571 -1.984496 1.312685

C -1.340557 -1.434459 0.948573

N -1.255248 0.021285 1.177545

C -2.054075 0.727372 2.239272

C -3.491927 0.171046 2.345497

H -3.689010 -0.129755 3.418460

C -3.730927 -1.163439 1.667281

N 2.440099 0.181829 -0.323963

C 2.257344 1.707865 -0.346534

C 3.434174 2.371826 -1.038319

C 3.701241 3.757772 -0.867026

C 4.893496 4.314827 -1.381282

H 5.206998 5.327000 -1.094382

C 5.702986 3.605996 -2.250511

H 6.580891 4.078802 -2.710435

C 1.851953 2.620394 0.954430

C 1.811201 4.099726 0.669232

C 2.761123 4.643099 -0.199363

N 0.447288 2.269607 1.239208

C -0.502426 2.957454 2.121200

C -0.473755 4.393650 1.715402

C 0.701903 4.910002 1.100309

C 0.696074 6.302790 0.801716

C 1.756023 6.852457 0.041199

H 1.766774 7.930991 -0.165795

C 2.731168 6.031589 -0.490457

H 3.454937 6.481089 -1.181158

C -0.404254 7.117989 1.193840

H -0.343351 8.201205 1.024155

C -1.547977 6.568186 1.738351

H -2.406349 7.200729 1.997243

C -1.623757 5.166122 1.949755

C -1.888470 2.255668 1.833883

H -2.001213 2.278666 0.710481

C -3.014398 3.134359 2.270309

C -2.841238 4.525342 2.343411

H -3.687059 5.159078 2.644443

C -4.301519 2.573059 2.348212

H -5.159018 3.243267 2.510275

C -4.553403 1.200586 2.152135

C -5.112891 -1.538205 1.509733

C -6.133484 -0.597265 1.663222

C -5.862976 0.762363 1.913355

H -6.690374 1.486292 1.908979

C 2.983977 -2.750695 -0.490337

O 3.872848 -2.502677 0.320016

O 2.166237 -3.773857 -0.113463

C 0.728997 -1.104672 -3.378709

O -0.181365 -1.309434 -4.152669

O 1.515825 -0.036490 -3.626053

H 1.204239 0.434836 -4.394914

C -2.134782 -1.016903 -1.457590

O -2.197728 0.207063 -1.502757

O -3.004073 -1.725485 -2.171259

H -3.595885 -1.166982 -2.669095

C -0.113122 -2.019055 1.686299

O 0.524621 -1.437126 2.613024

O 0.753721 -2.990175 1.242437

C -1.399853 0.523231 3.642991

O -1.818338 0.559983 4.763131

O -0.021788 0.182540 3.624437

C -0.078174 2.925233 3.597178

O -0.475580 3.542338 4.550664

O 0.969776 2.064334 3.891871

C 2.733737 2.076526 2.063844

O 3.659359 2.435182 2.730396

C 0.866542 1.645177 -1.002573

O 0.383179 2.176675 -1.963671

O 0.109552 0.761361 -0.254258

H -0.860270 0.759483 -0.494743

C -5.511167 -2.923819 1.101661

O -5.789074 -3.852484 1.835360

O -5.570936 -3.096952 -0.233199

H -5.885345 -3.968615 -0.457548

C -7.575541 -0.970149 1.497313

O -8.199775 -1.059045 0.460790

O -8.211141 -1.193868 2.666802

H -9.121279 -1.433058 2.515657

C -1.822731 -5.530040 0.296939

O -2.667144 -6.390995 0.218711

O -0.558065 -5.916481 0.627636

H -0.525641 -6.860948 0.756280

N -2.530944 -5.427226 -2.766754

O -2.785960 -6.576332 -3.039092

O -3.379427 -4.589031 -2.565088

O 2.334991 0.738200 2.260857

H 1.420088 2.360683 4.682179

H 2.649358 -4.398235 0.426546

H 2.656938 0.332921 3.072949

H 0.462848 0.461163 4.414352

H 0.418385 -3.630266 0.593114

Fe 1.455490 -1.251261 0.379180

Fe 0.412460 0.556269 1.777453

H 2.261352 -1.870403 2.700344

O 2.596765 -1.216875 2.062088

H 3.488244 -1.486714 1.768449

1. **References**

1 Christensen, A. S., Kubar, T., Cui, Q. & Elstner, M. Semiempirical Quantum Mechanical Methods for Noncovalent Interactions for Chemical and Biochemical Applications. *Chem. Rev.* **116**, 5301-5337, (2016).

2 Cundari, T. R. & Deng, J. PM3(tm) Analysis of Transition-Metal Complexes. *J. Chem. Inf. Comput. Sci.* **39**, 376-381, (1999).

3 Wang, G. *et al.* Synergistic Modulation of the Separation of Photo-Generated Carriers via Engineering of Dual Atomic Sites for Promoting Photocatalytic Performance. *Adv. Mater.* **33**, e2105904, (2021).

4 Xia, T. *et al.* Sunlight-Driven Highly Selective Catalytic Oxidation of 5-Hydroxymethylfurfural Towards Tunable Products. *Angew. Chem.* **61**, e202204225, (2022).

5 Fan, X., Ma, J., Wang, M., Gao, M. & Xu, J. Selective Aerobic Oxidation of Hydroxyl Compounds Catalyzed by Dimeric N-Salicylidene Oxovanadium Complexes. *ACS Catal.* **14**, 10538-10548, (2024).

6 Zhao, L. *et al.* Activation of Molecular Oxygen for Alcohol Oxidation over Vanadium Carbon Catalysts Synthesized via the Heterogeneous Ligand Strategy. *ACS Catal.* **12**, 15249-15258, (2022).

7 Zhu, Y. *et al.* In Situ Topochemical Transformation of ZnIn2S4 for Efficient Photocatalytic Oxidation of 5‐Hydroxymethylfurfural to 2,5‐Diformylfuran. *Adv. Funct. Mater.* **33**, 2304985, (2023).

8 Wang, Y. *et al.* Synergetic Effect of Heterojunction and Sulfur Vacancy on ZnIn2S4/CeO2 to Enhance the Photocatalytic Performance of 5‐Hydroxymethylfurfural into 2,5‐Diformylfuran. *Adv. Funct. Mater.*, 2415842, (2024).

9 Chen, L., Zhang, T., Cheng, H., Richards, R. M. & Qi, Z. A microwave assisted ionic liquid route to prepare bivalent Mn5O8 nanoplates for 5-hydroxymethylfurfural oxidation. *Nanoscale* **12**, 17902-17914, (2020).

10 Liao, X. *et al.* Bimetallic single atom promoted α-MnO2 for enhanced catalytic oxidation of 5-hydroxymethylfurfural. *Green Chem.* **24**, 8424-8433, (2022).

11 Fang, R., Luque, R. & Li, Y. Selective aerobic oxidation of biomass-derived HMF to 2,5-diformylfuran using a MOF-derived magnetic hollow Fe–Co nanocatalyst. *Green Chem.* **18**, 3152-3157, (2016).

12 Boonyakarn, T. *et al.* Effective Oxidation of 5-Hydroxymethylfurfural to 2,5-Diformylfuran by an Acetal Protection Strategy. *ChemSusChem* **15**, e202200059, (2022).

13 Buonerba, A. *et al.* Aerobic Oxidation and Oxidative Esterification of 5-Hydroxymethylfurfural by Gold Nanoparticles Supported on Nanoporous Polymer Host Matrix. *ChemSusChem* **11**, 3139-3149, (2018).

14 Artz, J., Mallmann, S. & Palkovits, R. Selective Aerobic Oxidation of HMF to 2,5-Diformylfuran on Covalent Triazine Frameworks-Supported Ru Catalysts. *ChemSusChem* **8**, 672-679, (2015).

15 Zhang, Z. *et al.* Iron Oxide Encapsulated by Ruthenium Hydroxyapatite as Heterogeneous Catalyst for the Synthesis of 2,5-Diformylfuran. *ChemSusChem* **7**, 3496-3504, (2014).

16 Ma, J., Du, Z., Xu, J., Chu, Q. & Pang, Y. Efficient aerobic oxidation of 5-hydroxymethylfurfural to 2,5-diformylfuran, and synthesis of a fluorescent material. *ChemSusChem* **4**, 51-54, (2011).

17 Liu, H. *et al.* Efficient Aerobic Oxidation of 5-Hydroxymethylfurfural to 2,5-Diformylfuran over Fe2O3-Promoted MnO2 Catalyst. *ACS Sustainable Chem. Eng.* **7**, 7812-7822, (2019).

18 Mishra, D. K., Cho, J. K. & Kim, Y. J. Facile production of 2,5-diformylfuran from base-free oxidation of 5-hydroxymethyl furfural over manganese–cobalt spinels supported ruthenium nanoparticles. *J. Ind. Eng. Chem.* **60**, 513-519, (2018).

19 Halgren, T. A. Merck molecular force field. I. Basis, form, scope, parameterization, and performance of MMFF94. *J. Comput. Chem.* **17**, 490-519, (1996).
